# N-Acetylcysteine Restores Isoflurane-induced Preconditioning against Myocardial Infarction during Hyperglycemia

Franz Kehl, M.D., D.E.A.A.,\* John G. Krolikowski, B.A.,† Dorothee Weihrauch, D.V.M., Ph.D.,‡ Paul S. Pagel, M.D., Ph.D.,§ David C. Warltier, M.D., Ph.D.,|| Judy R. Kersten, M.D.#

**Background:** Hyperglycemia generates reactive oxygen species and prevents isoflurane-induced preconditioning. The authors tested the hypothesis that scavenging reactive oxygen species with *N*-acetylcysteine will restore protection against myocardial infarction produced by isoflurane *in vivo*.

**Methods:** Barbiturate-anesthetized dogs ( $n = 45$ ) were instrumented for measurement of systemic hemodynamics. Myocardial infarct size and coronary collateral blood flow were measured with triphenyltetrazolium staining and radioactive microspheres, respectively. All dogs were subjected to a 60-min left anterior descending coronary artery occlusion followed by 3 h of reperfusion. Dogs were randomly assigned to receive an infusion of 0.9% saline or 15% dextrose in water to increase blood glucose concentrations to 600 mg/dl (hyperglycemia) in the absence or presence of isoflurane (1.0 minimum alveolar concentration) with or without pretreatment with *N*-acetylcysteine (150 mg/kg IV) in six experimental groups. Isoflurane was discontinued, and blood glucose concentrations were allowed to return to baseline values before left anterior descending coronary artery occlusion.

**Results:** Myocardial infarct size was  $27 \pm 2\%$  ( $n = 8$ ) of the left ventricular area at risk in control experiments. Isoflurane significantly ( $P < 0.05$ ) decreased infarct size ( $13 \pm 2\%$ ;  $n = 7$ ). Hyperglycemia alone did not alter infarct size ( $29 \pm 3\%$ ;  $n = 7$ ) but abolished the protective effect of isoflurane ( $25 \pm 2\%$ ;  $n = 8$ ). *N*-Acetylcysteine alone did not affect infarct size ( $28 \pm 2\%$ ;  $n = 8$ ) but restored isoflurane-induced cardioprotection during hyperglycemia ( $10 \pm 1\%$ ;  $n = 7$ ).

**Conclusions:** Acute hyperglycemia abolishes reductions in myocardial infarct size produced by isoflurane, but *N*-acetylcysteine restores these beneficial effects. The results suggest that excessive quantities of reactive oxygen species generated during hyperglycemia impair isoflurane-induced preconditioning in dogs.

MYOCARDIAL infarction is a major perioperative complication that is associated with significant morbidity and mortality.<sup>1</sup> Hyperglycemia related to or independent of diabetes mellitus increases the risk of adverse cardiovascular events,<sup>2,3</sup> but the mechanisms responsible for this

increase in risk are incompletely understood. Signal transduction pathways required for endogenous myocardial protection against ischemic injury are impaired by hyperglycemia or diabetes. We have previously demonstrated that diabetes and hyperglycemia block ischemic preconditioning and abolish reductions of infarct size produced by activation of adenosine triphosphate-regulated potassium ( $K_{ATP}$ ) channels.<sup>4,5</sup> Volatile anesthetic preconditioning (APC) is also markedly attenuated by hyperglycemia and diabetes.<sup>6,7</sup> Hyperglycemia generates large quantities of reactive oxygen species (ROS),<sup>8</sup> and such reactive intermediates have been strongly implicated in the pathogenesis of ischemia-reperfusion injury.<sup>9</sup> Whether hyperglycemia-induced ROS also adversely affects APC is unknown. We tested the hypothesis that the antioxidant *N*-acetylcysteine restores isoflurane-induced preconditioning during acute hyperglycemia in a canine model of experimental myocardial infarction.

## Materials and Methods

All experimental procedures and protocols used in this investigation were reviewed and approved by the Institutional Animal Care and Use Committee of the Medical College of Wisconsin. Furthermore, all conformed to the *Guiding Principles in the Care and Use of Animals* of the American Physiological Society and were in accordance with the *Guide for the Care and Use of Laboratory Animals* (National Academy Press, Washington, DC, 1996).

### General Preparation

Implantation of instruments has been described in detail previously.<sup>10</sup> Briefly, mongrel dogs of either sex were anesthetized with sodium barbital (200 mg/kg) and sodium pentobarbital (15 mg/kg) and ventilated using positive pressure with an air-oxygen mixture after tracheal intubation. Arterial blood pH was maintained within a physiologic range by adjustment of tidal volume and respiratory rate. End-tidal concentrations of isoflurane were measured at the tip of the endotracheal tube by an infrared anesthetic analyzer that was calibrated with known standards before and during experimentation. The canine minimum alveolar concentration of isoflurane used in the present investigation was 1.28%.<sup>11</sup> Temperature was maintained with a heating blanket. A 7-French, dual micromanometer-tipped catheter was inserted into the aorta and left ventricle (LV) for measure-

\* Research Fellow, † Research Scientist, ‡ Assistant Professor of Anesthesiology, § Professor and Director of Cardiac Anesthesia, || Professor of Anesthesiology, Pharmacology and Toxicology, and Medicine (Division of Cardiovascular Diseases) and Vice Chairman for Research, Department of Anesthesiology, # Professor of Anesthesiology, Pharmacology and Toxicology, Medical College of Wisconsin and the Zablocki VA Medical Center, Milwaukee, Wisconsin.

Received from the Departments of Anesthesiology, Medicine (Division of Cardiovascular Diseases), and Pharmacology and Toxicology, the Medical College of Wisconsin and the Zablocki VA Medical Center, Milwaukee, Wisconsin. Submitted for publication November 5, 2002. Accepted for publication February 11, 2003. This work was supported in part by grants HL-03690 (Dr. Kersten), HL-63705 (Dr. Kersten), HL-54820 (Dr. Warltier), and GM-08377 (Dr. Warltier) from the United States Public Health Service (Bethesda, Maryland).

Address reprint requests to Dr. Kersten: Medical College of Wisconsin, MEB-M4280, 8701 Watertown Plank Road, Milwaukee, Wisconsin 53226. Address electronic mail to: jkersten@mcw.edu. Additional article reprints may be purchased through the Journal Web site, www.anesthesiology.org.

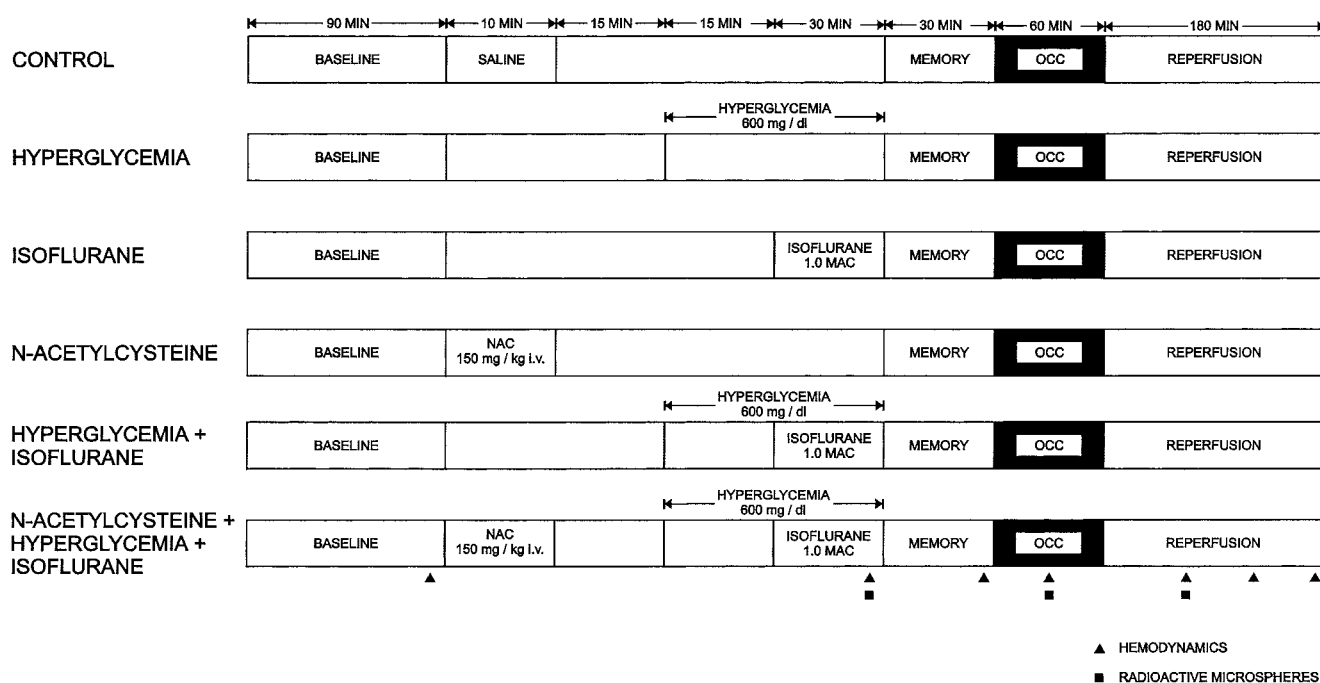

Fig. 1. Schematic diagram illustrating the experimental protocol. MAC = minimum alveolar concentration; NAC = *N*-acetylcysteine; OCC = occlusion.

ment of aortic and LV pressures and the maximum rate of increase of LV pressure ( $+dp/dt_{max}$ ). Heparin-filled catheters were inserted into the left atrial appendage and the right femoral artery for administration of radioactive microspheres and withdrawal of reference blood flow samples, respectively. A catheter was also inserted into the right femoral vein for fluid or drug administration. A 1-cm segment of the left anterior descending coronary artery (LAD) was isolated immediately distal to the first diagonal branch, and a silk ligature was placed around the vessel for production of coronary artery occlusion and reperfusion. Hemodynamics were monitored continuously on a polygraph and digitized using a computer interfaced with an analog-to-digital converter.

#### Experimental Protocol

Baseline systemic hemodynamics were recorded 90 min after instrumentation was completed and calibrated. All dogs were subjected to a 60-min LAD occlusion followed by 3 h of reperfusion (fig. 1). Dogs were randomly assigned to receive 0.9% saline or 15% dextrose in water to increase blood glucose concentrations to 600 mg/dl in the absence or presence of isoflurane (1.0 minimum alveolar concentration) with or without *N*-acetylcysteine in six separate experimental groups. *N*-Acetylcysteine (150 mg/kg IV over a period of 10 min)<sup>12</sup> was infused 15 min before administration of dextrose. Isoflurane was administered for 30 min and discontinued 30 min before LAD occlusion.<sup>13</sup> Blood glucose concentrations were allowed to return to baseline values 30 min before LAD occlusion. Regional myocardial blood

flow was measured at baseline, during LAD occlusion, and after 1 h of reperfusion. Dogs that developed intractable ventricular fibrillation and those with a subendocardial coronary collateral blood flow greater than  $0.15 \text{ ml} \cdot \text{min}^{-1} \cdot \text{g}^{-1}$  were excluded from the analysis.<sup>14</sup>

#### Measurement of Myocardial Infarct Size

At the end of each experiment, myocardial infarct size was measured as previously described.<sup>15</sup> Briefly, the LV area at risk for infarction (AAR) was separated from the normal area, and the two regions were incubated at  $37^\circ\text{C}$  for 20–30 min in 1% 2,3,5-triphenyltetrazolium chloride in 0.1 M phosphate buffer adjusted to pH 7.4. After overnight storage in 10% formaldehyde, infarcted and noninfarcted myocardial areas within the AAR were carefully separated and weighed. Infarct size was expressed as a percentage of the AAR.

#### Determination of Regional Myocardial Blood Flow

Carbonized plastic microspheres ( $15 \pm 2 \mu\text{m}$  [SD] in diameter) labeled with  $^{141}\text{Ce}$ ,  $^{103}\text{Ru}$ , or  $^{95}\text{Nb}$  were used to measure regional myocardial perfusion as described previously.<sup>10</sup> Transmural tissue samples were selected from the ischemic region (distal to the LAD occlusion) and were subdivided into subepicardial, midmyocardial, and subendocardial layers of approximately equal thickness. Samples were weighed and placed in scintillation vials, and the activity of each isotope was determined. Similarly, the activity of each isotope in the reference blood flow sample was assessed. Tissue blood flow was calculated as  $\dot{Q}_r \cdot C_m \cdot C_r^{-1}$ , where  $\dot{Q}_r$  = rate of with-

**Table 1. Blood Glucose Concentrations**

|                 | Baseline | Intervention | 30-min CAO | Reperfusion, h |        |
|-----------------|----------|--------------|------------|----------------|--------|
|                 |          |              |            | 1              | 3      |
| CON             | 75 ± 4   | 62 ± 8       | 69 ± 5     | 66 ± 2         | 66 ± 5 |
| NAC             | 79 ± 3   | 72 ± 7       | 76 ± 6     | 80 ± 5         | 78 ± 4 |
| HYP             | 65 ± 5   | 577 ± 12*†   | 69 ± 13    | 76 ± 10        | 89 ± 8 |
| ISO             | 72 ± 4   | 70 ± 5       | 69 ± 2     | 67 ± 4         | 63 ± 5 |
| HYP + ISO       | 75 ± 4   | 584 ± 4*†    | 82 ± 13    | 59 ± 5         | 67 ± 7 |
| NAC + HYP + ISO | 73 ± 5   | 577 ± 9*†    | 149 ± 24*† | 72 ± 11        | 73 ± 8 |

Data are mg/dl, mean ± SEM. Intervention = administration of saline, dextrose or *N*-acetylcysteine in the presence or absence of isoflurane.

\* Significantly ( $P < 0.05$ ) different from baseline. † Significantly ( $P < 0.05$ ) different from the respective value in control experiments.

CAO = coronary artery occlusion; CON = control; HYP = hyperglycemia; ISO = isoflurane; NAC = *N*-acetylcysteine.

drawal of the reference blood flow sample (ml/min),  $C_m$  = activity (counts per minute per gram) of the myocardial tissue sample, and  $C_r$  = activity (counts per minute) of the reference blood flow sample. Transmural blood flow was considered to be the average of subepicardial, midmyocardial, and subendocardial blood flows.

#### Statistical Analysis

Statistical analysis of data within and between groups was performed with ANOVA for repeated measures followed by Student-Newman-Keuls test. Changes within and between groups were considered statistically significant at a value (two-tailed) of  $P < 0.05$ . All data are expressed as mean ± SEM.

## Results

Forty-six dogs were instrumented to obtain 45 successful experiments. One dog in the isoflurane plus hyperglycemia group was excluded because blood glucose concentrations could not be maintained at 600 mg/dl. Blood glucose concentrations (table 1) were similar among groups at baseline. Blood glucose concentrations during dextrose administration were similar in the presence or absence of isoflurane or *N*-acetylcysteine. Blood glucose concentration returned to baseline values during reperfusion in each experimental group.

#### Hemodynamics and Collateral Blood Flow

There were no significant differences in hemodynamics between experimental groups at baseline (table 2). A transient increase in  $LV + dP/dt_{max}$  was observed during hyperglycemia. *N*-Acetylcysteine alone did not alter hemodynamics. Isoflurane decreased heart rate, mean arterial and LV systolic pressures, and  $LV + dP/dt_{max}$  in the presence or absence of hyperglycemia or *N*-acetylcysteine. Mean arterial and LV systolic pressures and  $LV + dP/dt_{max}$  returned to baseline values 30 min after isoflurane was discontinued. LAD occlusion and reperfusion produced similar increases in LV end-diastolic pressure and decreases in  $LV + dP/dt_{max}$  in all experimental groups. LAD occlusion decreased transmural

myocardial perfusion in the ischemic region (table 3). There were no significant differences in coronary collateral blood flow between groups.

#### Myocardial Infarct Size

The LV AAR was similar between groups (control,  $39 \pm 2\%$ ; *N*-acetylcysteine,  $41 \pm 1\%$ ; isoflurane,  $37 \pm 1\%$ ; hyperglycemia,  $37 \pm 2\%$ ; isoflurane plus hyperglycemia,  $37 \pm 2\%$ ; *N*-acetylcysteine plus isoflurane plus hyperglycemia,  $39 \pm 3\%$ ). Myocardial infarct size expressed as a percentage of the AAR was  $27 \pm 2\%$  ( $n = 8$ ) in dogs receiving 0.9% saline. Isoflurane reduced infarct size to  $13 \pm 2\%$  ( $n = 7$ ) of the AAR (fig. 2). Hyperglycemia ( $n = 7$ ) alone did not alter myocardial infarct size ( $29 \pm 3\%$ ) but blocked the protective effect of isoflurane ( $25 \pm 2\%$ ,  $n = 8$ ). *N*-Acetylcysteine did not affect myocardial infarct size ( $28 \pm 2\%$ ,  $n = 8$ ) but restored the protective effect of isoflurane during hyperglycemia ( $10 \pm 1\%$ ,  $n = 7$ ).

## Discussion

ROS have traditionally been viewed as toxic mediators of cellular injury. However, recent evidence indicates that small quantities of ROS act as important triggers of intracellular signaling. ROS generated by the mitochondrial electron transport chain during brief episodes of hypoxia or ischemia have been shown to activate signal transduction pathways that confer protection of ischemic myocardium.<sup>16,17</sup> Diazoxide, a selective mitochondrial  $K_{ATP}$  channel agonist, produces preconditioning by generating ROS. In contrast, the free radical scavengers *N*-2-mercaptopropionyl glycine and *N*-acetylcysteine reduce the intracellular concentration of ROS and abolish cardioprotection.<sup>18–20</sup> ROS also seem to be important triggers of APC. Volatile anesthetics cause profound reductions of myocardial infarct size and enhance the functional recovery of stunned myocardium.<sup>13,21–23</sup> These beneficial effects are blocked by antioxidant treatment.<sup>23–25</sup> Using confocal fluorescent microscopy with dihydroethidium staining, we recently demonstrated that isoflurane directly generates ROS. This effect is blocked by administration of *N*-2-mercaptopropionyl gly-

Table 2. Systemic Hemodynamics

|                                | Baseline    | Intervention | Memory       | 30-min CAO   | Reperfusion, h |             |             |
|--------------------------------|-------------|--------------|--------------|--------------|----------------|-------------|-------------|
|                                |             |              |              |              | 1              | 2           | 3           |
| HR, beats/min                  |             |              |              |              |                |             |             |
| CON                            | 141 ± 5     | 137 ± 8      | 136 ± 7      | 133 ± 6      | 121 ± 6*       | 117 ± 7*    | 121 ± 7*    |
| NAC                            | 140 ± 7     | 130 ± 7      | 128 ± 6      | 123 ± 6*     | 126 ± 6        | 129 ± 6     | 128 ± 6     |
| HYP                            | 132 ± 7     | 128 ± 8      | 128 ± 8      | 128 ± 6      | 113 ± 6*       | 112 ± 5*    | 115 ± 6*    |
| ISO                            | 137 ± 4     | 109 ± 3*†    | 120 ± 4*     | 124 ± 4*     | 117 ± 6*       | 115 ± 7*    | 118 ± 9*    |
| HYP + ISO                      | 135 ± 4     | 111 ± 3*†    | 127 ± 5      | 131 ± 4      | 122 ± 3        | 122 ± 4     | 121 ± 5     |
| NAC + HYP + ISO                | 123 ± 7     | 95 ± 4*†     | 108 ± 4†     | 108 ± 5†     | 104 ± 4*       | 100 ± 5*    | 104 ± 6*    |
| MAP, mmHg                      |             |              |              |              |                |             |             |
| CON                            | 103 ± 6     | 102 ± 7      | 103 ± 5      | 96 ± 4       | 100 ± 5        | 105 ± 5     | 103 ± 5     |
| NAC                            | 107 ± 3     | 101 ± 4      | 103 ± 4      | 87 ± 4*      | 87 ± 7*        | 93 ± 6      | 95 ± 7      |
| HYP                            | 103 ± 4     | 100 ± 6      | 97 ± 4       | 82 ± 5*      | 92 ± 4         | 97 ± 5      | 94 ± 5      |
| ISO                            | 96 ± 6      | 60 ± 4*†     | 103 ± 2      | 96 ± 3       | 95 ± 2         | 95 ± 2      | 98 ± 2      |
| HYP + ISO                      | 95 ± 4      | 70 ± 4*†     | 95 ± 3       | 82 ± 5       | 91 ± 4         | 92 ± 5      | 91 ± 5      |
| NAC + HYP + ISO                | 97 ± 3      | 61 ± 5*†     | 97 ± 4       | 90 ± 6       | 96 ± 3         | 97 ± 3      | 98 ± 4      |
| LVSP, mmHg                     |             |              |              |              |                |             |             |
| CON                            | 114 ± 8     | 115 ± 10     | 114 ± 7      | 102 ± 6      | 100 ± 6        | 107 ± 6     | 108 ± 5     |
| NAC                            | 117 ± 3     | 113 ± 5      | 114 ± 5      | 92 ± 4*      | 90 ± 7*        | 98 ± 6*     | 98 ± 7*     |
| HYP                            | 112 ± 3     | 110 ± 6      | 107 ± 4      | 85 ± 6*      | 96 ± 5*        | 101 ± 5     | 98 ± 5      |
| ISO                            | 106 ± 5     | 67 ± 3*†     | 109 ± 3      | 101 ± 3      | 98 ± 2         | 100 ± 2     | 102 ± 2     |
| HYP + ISO                      | 107 ± 3     | 80 ± 4*†     | 103 ± 2      | 88 ± 6       | 95 ± 4         | 96 ± 4      | 95 ± 5      |
| NAC + HYP + ISO                | 104 ± 4     | 66 ± 6*†     | 104 ± 4      | 92 ± 6       | 89 ± 4*        | 97 ± 5      | 98 ± 6      |
| LVEDP, mmHg                    |             |              |              |              |                |             |             |
| CON                            | 6 ± 1       | 7 ± 1        | 6 ± 1        | 16 ± 2*      | 19 ± 2*        | 15 ± 3      | 16 ± 3*     |
| NAC                            | 5 ± 1       | 5 ± 1        | 5 ± 1        | 20 ± 4*      | 16 ± 3*        | 12 ± 3      | 11 ± 3      |
| HYP                            | 7 ± 1       | 10 ± 2       | 6 ± 2        | 11 ± 2*      | 13 ± 1*        | 13 ± 2*     | 12 ± 2*     |
| ISO                            | 5 ± 2       | 8 ± 1        | 7 ± 1        | 12 ± 2*      | 12 ± 1*        | 11 ± 2*     | 11 ± 1*     |
| HYP + ISO                      | 5 ± 1       | 9 ± 1*       | 4 ± 1        | 11 ± 3*      | 12 ± 2*        | 10 ± 1*     | 10 ± 1*     |
| NAC + HYP + ISO                | 9 ± 2       | 11 ± 1       | 7 ± 1        | 17 ± 4*      | 16 ± 3         | 15 ± 2      | 14 ± 2      |
| +dP/dt <sub>max</sub> , mmHg/s |             |              |              |              |                |             |             |
| CON                            | 2,240 ± 160 | 1,900 ± 110  | 2,330 ± 160  | 1,840 ± 110* | 1,520 ± 70*    | 1,500 ± 80* | 1,350 ± 60* |
| NAC                            | 1,910 ± 160 | 1,820 ± 140  | 1,800 ± 120† | 1,330 ± 90*† | 1,420 ± 110*   | 1,600 ± 90  | 1,530 ± 70* |
| HYP                            | 1,710 ± 60  | 2,100 ± 160* | 1,950 ± 90*  | 1,440 ± 120* | 1,520 ± 80     | 1,480 ± 70  | 1,380 ± 60* |
| ISO                            | 1,910 ± 170 | 970 ± 70*†   | 1,760 ± 150† | 1,660 ± 120  | 1,510 ± 90*    | 1,480 ± 90* | 1,470 ± 80* |
| HYP + ISO                      | 1,750 ± 100 | 1,220 ± 40*† | 1,680 ± 80†  | 1,340 ± 150* | 1,460 ± 100*   | 1,380 ± 80* | 1,310 ± 70* |
| NAC + HYP + ISO                | 1,870 ± 200 | 1,110 ± 90*† | 1,930 ± 90   | 1,610 ± 90   | 1,390 ± 50*    | 1,400 ± 60* | 1,400 ± 60* |

Data are mean ± SEM. Intervention = administration of saline, dextrose, or *N*-acetylcysteine in the presence or absence of isoflurane.

\* Significantly ( $P < 0.05$ ) different from baseline. † Significantly ( $P < 0.05$ ) different from the respective value in control experiments.

CAO = coronary artery occlusion; CON = control; +dP/dt<sub>max</sub> = maximal rate of increase of left ventricular pressure; HR = heart rate; HYP = hyperglycemia; ISO = isoflurane; LVSP and LVEDP = left ventricular systolic and end-diastolic pressures, respectively; MAP = mean aortic blood pressure; NAC = *N*-acetylcysteine.

cine, *N*-acetylcysteine, or the mitochondrial K<sub>ATP</sub> channel antagonist 5-hydroxydecanoate.<sup>25</sup> These data provide strong support to the contention that small quantities of ROS are required for APC.

Large quantities of oxygen-derived free radicals are released during ischemia and reperfusion and cause direct lipid peroxidation, mitochondrial damage, and cell death.<sup>9,26</sup> Excessive amounts of ROS are also generated by the mitochondrial electron transport chain during hyperglycemia,<sup>27</sup> and these reactive intermediates may contribute to myocardial injury as well. We have previously demonstrated that hyperglycemia either independent of or secondary to diabetes mellitus attenuates APC in dogs.<sup>6,7</sup> An interaction between the dose of volatile anesthetic and severity of hyperglycemia was also observed. Higher blood glucose concentrations were necessary to block the protection of 1.0 compared with 0.5 minimum alveolar concentration isoflurane.<sup>6</sup> This obser-

vation led us to hypothesize that volatile anesthetics and glucose may exert opposing actions on K<sub>ATP</sub> channel activity. The current results confirm and extend our previous findings and further suggest that the interaction between isoflurane and hyperglycemia is sensitive to the oxidation-reduction state within the cardiac myocyte.

The mitochondrial K<sub>ATP</sub> channel plays a central role in both APC and ischemic preconditioning.<sup>13,14,22,28</sup> However, a direct cause-and-effect relationship between mitochondrial K<sub>ATP</sub> channel opening and the production of ROS has not been demonstrated conclusively during APC or ischemic preconditioning. ROS enhance mitochondrial K<sub>ATP</sub> channel activity but are also released when the channel is opened. Superoxide anion generated by xanthine oxidase activates mitochondrial K<sub>ATP</sub> channels from bovine ventricular myocardium reconstituted in lipid bilayers.<sup>29</sup> The mitochondrial K<sub>ATP</sub> channel agonist diazoxide also generates ROS measured with a



**Table 3. Transmural Myocardial Perfusion in the Ischemic (LAD) Region**

|                 | Baseline    | 30-min CAO   | 1 h Reperfusion |
|-----------------|-------------|--------------|-----------------|
| CON             | 1.24 ± 0.14 | 0.07 ± 0.02* | 1.68 ± 0.17*    |
| NAC             | 0.76 ± 0.06 | 0.05 ± 0.01* | 1.47 ± 0.14*    |
| HYP             | 1.27 ± 0.16 | 0.05 ± 0.01* | 2.00 ± 0.32*    |
| ISO             | 0.78 ± 0.11 | 0.08 ± 0.01* | 1.65 ± 0.33*    |
| HYP + ISO       | 1.11 ± 0.10 | 0.05 ± 0.01* | 1.80 ± 0.24*    |
| NAC + HYP + ISO | 0.77 ± 0.16 | 0.07 ± 0.02* | 1.21 ± 0.16*    |

Data are ml · min<sup>-1</sup> · g<sup>-1</sup> mean ± SEM.

\* Significantly ( $P < 0.05$ ) different from baseline.

CAO = coronary artery occlusion; CON = control; HYP = hyperglycemia; ISO = isoflurane; LAD = left anterior descending coronary artery; NAC = N-acetylcysteine.

mitochondria-specific fluorescent probe.<sup>19</sup> However, it is possible that this action of diazoxide may not be a result of direct activation of the channels but instead may result from nonspecific uncoupling of electron transport. Interestingly, diazoxide markedly reduces ROS production in cardiac mitochondria subjected to hypoxia and reoxygenation.<sup>30</sup> Thus, the protective effects of mitochondrial K<sub>ATP</sub> channel agonists may occur as a consequence of triggering by ROS that subsequently prevents the release of larger quantities of these reactive intermediates during reperfusion injury. Experiments conducted in isolated mitochondria demonstrate that a triggering quantity of ROS may exceed a critical threshold that results in a transition in mitochondrial inner membrane permeability and the subsequent release of a burst of ROS in a process that has been called "ROS-induced ROS release."<sup>31</sup> This transition in mitochondrial permeability precedes necrotic or apoptotic cell death, and glutathione is a primary defense against this event.<sup>31,32</sup> The current and previous results suggest that

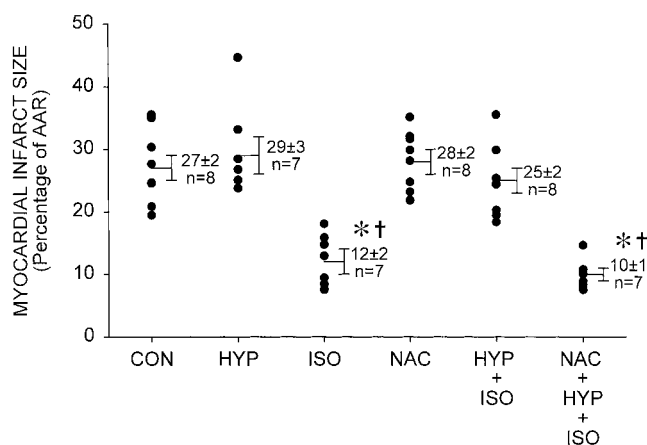

**Fig. 2.** Histogram illustrating myocardial infarct size as a percentage of the left ventricular area at risk (AAR) in dogs receiving 0.9% saline (CON) or 15% dextrose in water to increase blood glucose concentrations to 600 mg/dl (HYP) in the absence or presence of isoflurane (ISO; 1.0 minimum alveolar concentration [MAC]) and N-acetylcysteine (NAC; 150 mg/kg intravenously). \*Significantly ( $P < 0.05$ ) different from CON. †Significantly ( $P < 0.05$ ) different from HYP + ISO.

hyperglycemia may accelerate, but volatile anesthetics or other mitochondrial K<sub>ATP</sub> channel agonists may prevent this mitochondrial permeability transition in an oxidant-sensitive manner. This intriguing hypothesis remains to be specifically tested. There is also evidence to suggest that different ROS exert opposing actions on mitochondrial K<sub>ATP</sub> channel activity, especially during conditions of high oxidative stress, such as hyperglycemia. Dismutation of superoxide anion leads to production of secondary ROS, including hydrogen peroxide, hydroxyl radical, and peroxynitrite,<sup>33</sup> and these radicals may differentially alter potassium channel activity. For example, superoxide anion and hydrogen peroxide enhance but peroxynitrite decreases calcium-activated potassium channel activity in rat cerebral arteries.<sup>34</sup> An important goal of future research will be to determine the actions of different species of free radicals on K<sub>ATP</sub> channel activity and their impact on APC.

Nitric oxide is also a critical mediator of endogenous cardioprotective signal transduction. Nitric oxide directly activates mitochondrial K<sub>ATP</sub> channels and potentiates agonist-induced increases in channel activity.<sup>35</sup> Diazoxide has been demonstrated to produce early and delayed preconditioning against infarction by activating mitochondrial K<sub>ATP</sub> channels through a nitric oxide-dependent mechanism.<sup>36</sup> In contrast, hyperglycemia decreases the availability of nitric oxide by enhancing ROS production. Superoxide anion reacts with and inactivates nitric oxide and leads to the formation of peroxynitrite.<sup>37,38</sup> Many of the adverse consequences of hyperglycemia and diabetes are thought to result from decreased nitric oxide activity and increased generation of reactive intermediates. However, far less is known about the deleterious interactions among ROS, nitric oxide, and K<sub>ATP</sub> channels during diabetes or how such interactions might affect APC.

The current results should be interpreted within the constraints of several potential limitations. First, ROS were not directly measured in the present investigation. However, we have shown previously that isoflurane directly produces ROS and that this effect is abolished by mitochondrial K<sub>ATP</sub> channel antagonists and ROS scavengers, including N-acetylcysteine.<sup>25</sup> The ability of hyperglycemia to generate large quantities of ROS has also been well documented,<sup>8</sup> and using dihydroethidium staining, we have recently demonstrated that hyperglycemia dose-dependently increases ROS in canine myocardium.<sup>39</sup> N-Acetylcysteine was used to scavenge ROS. This drug is a sulfhydryl-containing glutathione precursor that exerts antioxidant effects by contributing to glutathione synthesis, serving as a glutathione peroxidase substrate, and directly scavenging several ROS through the actions of reduced glutathione.<sup>40</sup> The results indicate that hyperglycemia impairs APC. This effect is reversed by N-acetylcysteine, suggesting a role for ROS in this process. However, the identity of a specific ROS

involved in the interaction between hyperglycemia and APC was not determined in the present investigation, and it is possible that the beneficial effect of *N*-acetylcysteine occurred through an alternative pathway, such as inhibition of advanced glycation end products.<sup>41</sup> This mechanism is unlikely to account for the current experimental findings, however, because the formation of advanced glycation end products requires long-term (days to weeks) exposure to hyperglycemia.

The area of the LV at risk for infarction and coronary collateral blood flow are important determinants of the extent of myocardial infarction; however, no differences in these variables were observed among experimental groups that would account for the current findings. Isoflurane caused similar hemodynamic effects in the presence or absence of hyperglycemia and *N*-acetylcysteine. Hyperglycemia and *N*-acetylcysteine alone had few hemodynamic effects, yet their presence significantly influenced the protective effect of isoflurane. Although it is unlikely that the hemodynamic effects of isoflurane, *N*-acetylcysteine, or hyperglycemia were responsible for the observed differences in infarct size, coronary venous oxygen tension was not measured and myocardial oxygen consumption was not directly quantified in the present investigation. Thus, changes in myocardial metabolism during the administration of isoflurane in the presence or absence of hyperglycemia or *N*-acetylcysteine cannot be completely excluded from the analysis. Experiments were conducted in an established model of myocardial infarction using acutely instrumented, barbiturate-anesthetized dogs, but these results may not be directly comparable to those in anesthetized humans.

In summary, the current results confirm our previous findings indicating that hyperglycemia abolishes the myocardial protection produced by isoflurane and demonstrate that pretreatment with the antioxidant *N*-acetylcysteine before the onset of hyperglycemia restores the beneficial effects of isoflurane in dogs. The current results further suggest that cardioprotective signal transduction during administration of isoflurane is sensitive to the oxidation-reduction state within the cardiac myocyte. Defining the precise relationships between ROS, mitochondrial  $K_{ATP}$  channels, and nitric oxide and their role in APC represent important goals of future research.

The authors thank David Schwabe, B.S. (Research Scientist), and Mary Lorence-Hanke, A.A. (both from the Department of Anesthesiology, Medical College of Wisconsin), for assistance in preparation of this manuscript.

## References

1. Mangano DT, Layug EL, Wallace A, Tateo I: Effect of atenolol on mortality and cardiovascular morbidity after noncardiac surgery. Multicenter Study of Perioperative Ischemia Research Group. *N Engl J Med* 1996; 335:1713-20
2. Lee TH, Marcantonio ER, Mangione CM, Thomas EJ, Polanczyk CA, Cook EF, Sugarbaker DJ, Donaldson MD, Poss R, Ho KK, Ludwig LE, Pedan A, Goldman L: Derivation and prospective validation of a simple index for prediction of cardiac risk of major noncardiac surgery. *Circulation* 1999; 100:1043-9

3. Palda VA, Detsky AS: Perioperative assessment and management of risk from coronary artery disease. *Ann Intern Med* 1997; 127:313-28
4. Kersten JR, Montgomery MW, Ghassemi T, Gross ER, Toller WG, Pagel PS, Warltier DC: Diabetes and hyperglycemia impair activation of mitochondrial  $K_{ATP}$  channels. *Am J Physiol Heart Circ Physiol* 2001; 280:H1744-50
5. Kersten JR, Toller WG, Gross ER, Pagel PS, Warltier DC: Diabetes abolishes ischemic preconditioning: role of glucose, insulin, and osmolality. *Am J Physiol Heart Circ Physiol* 2000; 278:H1218-24
6. Kehl F, Krolkowski JG, Mraovic B, Pagel PS, Warltier DC, Kersten JR: Hyperglycemia prevents isoflurane-induced preconditioning against myocardial infarction. *ANESTHESIOLOGY* 2002; 96:183-8
7. Tanaka K, Kehl F, Gu W, Krolkowski JG, Pagel PS, Warltier DC, Kersten JR: Isoflurane-induced preconditioning is attenuated by diabetes. *Am J Physiol Heart Circ Physiol* 2002; 282:H2018-23
8. Nishikawa T, Edelstein D, Du XL, Yamagishi S, Matsumura T, Kaneda Y, Yorek MA, Beebe D, Oates PJ, Hammes HP, Giordino I, Brownlee M: Normalizing mitochondrial superoxide production blocks three pathways of hyperglycaemic damage. *Nature* 2000; 404:787-90
9. Becker LB, vanden Hoek TL, Shao ZH, Li CQ, Schumacker PT: Generation of superoxide in cardiomyocytes during ischemia before reperfusion. *Am J Physiol Heart Circ Physiol* 1999; 277:H2240-6
10. Kersten JR, Schmeling TJ, Hettrick DA, Pagel PS, Gross GJ, Warltier DC: Mechanism of myocardial protection by isoflurane: Role of adenosine triphosphate-regulated potassium ( $K_{ATP}$ ) channels. *ANESTHESIOLOGY* 1996; 85:794-807
11. Steffey EP, Howland D Jr: Isoflurane potency in the dog and cat. *Am J Vet Res* 1977; 38:1833-6
12. Gare M, Mraovic B, Kehl F, Kersten JR, Warltier DC, Pagel PS: Reactive oxygen species contribute to contractile dysfunction following rapid ventricular pacing in dogs. *Int J Cardiol* 2002; 83:125-31
13. Kersten JR, Schmeling TJ, Pagel PS, Gross GJ, Warltier DC: Isoflurane mimics ischemic preconditioning via activation of  $K_{ATP}$  channels: Reduction of myocardial infarct size with an acute memory phase. *ANESTHESIOLOGY* 1997; 87:361-70
14. Gross GJ, Auchampach JA: Role of ATP dependent potassium channels in myocardial ischaemia. *Cardiovasc Res* 1992; 26:1011-6
15. Warltier DC, Zyvoloski MG, Gross GJ, Hardman HF, Brooks HL: Determination of experimental myocardial infarct size. *J Pharmacol Methods* 1981; 6:199-210
16. Baines CP, Goto M, Downey JM: Oxygen radicals released during ischemic preconditioning contribute to cardioprotection in the rabbit myocardium. *J Mol Cell Cardiol* 1997; 29:207-16
17. Vanden Hoek TL, Becker LB, Shao Z, Li C, Schumacker PT: Reactive oxygen species released from mitochondria during brief hypoxia induce preconditioning in cardiomyocytes. *J Biol Chem* 1998; 273:18092-8
18. Pain T, Yang XM, Critz SD, Yue Y, Nakano A, Liu GS, Heusch G, Cohen MV, Downey JM: Opening of mitochondrial  $K_{ATP}$  channels triggers the preconditioned state by generating free radicals. *Circ Res* 2000; 87:460-6
19. Carroll R, Gant VA, Yellon DM: Mitochondrial  $K_{ATP}$  channel opening protects a human atrial-derived cell line by a mechanism involving free radical generation. *Cardiovasc Res* 2001; 51:691-700
20. Forbes RA, Steenbergen C, Murphy E: Diazoxide-induced cardioprotection requires signaling through a redox-sensitive mechanism. *Circ Res* 2001; 88:802-9
21. Ismaeil MS, Tkachenko I, Gamperl AK, Hickey RF, Cason BA: Mechanisms of isoflurane-induced myocardial preconditioning in rabbits. *ANESTHESIOLOGY* 1999; 90:812-21
22. Piriou V, Chiari P, Knezynski S, Bastien O, Loufoua J, Lehot JJ, Foex P, Annat G, Ovize M: Prevention of isoflurane-induced preconditioning by 5-hydroxydecanoate and gadolinium: Possible involvement of mitochondrial adenosine triphosphate-sensitive potassium and stretch-activated channels. *ANESTHESIOLOGY* 2000; 93:756-64
23. Müllenheim J, Ebel D, Fräsdorf J, Preckel B, Thämer V, Schlack W: Isoflurane preconditions myocardium against infarction via release of free radicals. *ANESTHESIOLOGY* 2002; 96:934-40
24. Tanaka K, Weihrauch D, Kehl F, Ludwig LM, LaDisa JF Jr, Kersten JR, Pagel PS, Warltier DC: Mechanism of preconditioning by isoflurane in rabbits: A direct role for reactive oxygen species. *ANESTHESIOLOGY* 2002; 97:1485-90
25. Tanaka K, Weihrauch D, Ludwig LM, Kersten JR, Pagel PS, Warltier DC: Mitochondrial adenosine triphosphate-regulated potassium channel opening acts as a trigger for isoflurane-induced preconditioning by generating reactive oxygen species. *ANESTHESIOLOGY* 2003; 98:935-43
26. Lesnèfsky EJ, Moghaddas S, Tandler B, Kerner J, Hoppel CL: Mitochondrial dysfunction in cardiac disease: Ischemia-reperfusion, aging, and heart failure. *J Mol Cell Cardiol* 2001; 33:1065-89
27. Ceriello A, Quagliaro L, D'Amico M, Di Filippo C, Marfella R, Nappo F, Berrino L, Rossi F, Giugliano D: Acute hyperglycemia induces nitrotyrosine formation and apoptosis in perfused heart from rat. *Diabetes* 2002; 51:1076-82
28. Toller WG, Gross ER, Kersten JR, Pagel PS, Gross GJ, Warltier DC: Sarcolemmal and mitochondrial adenosine triphosphate-dependent potassium channels: Mechanism of desflurane-induced cardioprotection. *ANESTHESIOLOGY* 2000; 92:1731-9
29. Zhang DX, Chen YF, Campbell WB, Zou AP, Gross GJ, Li PL: Characteristics and superoxide-induced activation of reconstituted myocardial mitochondrial ATP-sensitive potassium channels. *Circ Res* 2001; 89:1177-83

30. Ozcan C, Bienengraeber M, Dzeja PP, Terzic A: Potassium channel openers protect cardiac mitochondria by attenuating oxidant stress at reoxygenation. *Am J Physiol Heart Circ Physiol* 2002; 282:H531-9
31. Zorov DB, Filburn CR, Klotz LO, Zweier JL, Sollott SJ: Reactive oxygen species (ROS)-induced ROS release: A new phenomenon accompanying induction of the mitochondrial permeability transition in cardiac myocytes. *J Exp Med* 2000; 192:1001-14
32. Kowaltowski AJ, Castilho RF, Vercesi AE: Mitochondrial permeability transition and oxidative stress. *FEBS Lett* 2001; 495:12-5
33. Cuzzocrea S, Riley DP, Caputi AP, Salvemini D: Antioxidant therapy: A new pharmacological approach in shock, inflammation, and ischemia/reperfusion injury. *Pharmacol Rev* 2001; 53:135-59
34. Liu Y, Gutterman DD: Oxidative stress and potassium channel function. *Clin Exp Pharmacol Physiol* 2002; 29:305-11
35. Sasaki N, Sato T, Ohler A, O'Rourke B, Marban E: Activation of mitochondrial ATP-dependent potassium channels by nitric oxide. *Circulation* 2000; 101: 439-45
36. Ockaili R, Emani VR, Okubo S, Brown M, Krottapalli K, Kukreja RC: Opening of mitochondrial KATP channel induces early and delayed cardioprotective effect: role of nitric oxide. *Am J Physiol Heart Circ Physiol* 1999; 277: H2425-34
37. Giugliano D, Marfella R, Coppola L, Verrazzo G, Acampora R, Giunta R, Nappo F, Lucarelli C, D'Onofrio F: Vascular effects of acute hyperglycemia in humans are reversed by L-arginine: evidence for reduced availability of nitric oxide during hyperglycemia. *Circulation* 1997; 95:1783-90
38. Gryglewski RJ, Palmer RM, Moncada S: Superoxide anion is involved in the breakdown of endothelium-derived vascular relaxing factor. *Nature* 1986; 320: 454-6
39. Gross ER, LaDisa JF Jr, Weihrauch D, Olson LE, Kress TT, Hettrick DA, Pagel PS, Warltier DC, Kersten JR: Reactive oxygen species modulate coronary wall shear stress and endothelial function during hyperglycemia. *Am J Physiol Heart Circ Physiol* 2003; 284:H1552-9
40. Aruoma OI, Halliwell B, Hoey BM, Butler J: The antioxidant action of N-acetylcysteine: Its reaction with hydrogen peroxide, hydroxyl radical, superoxide, and hypochlorous acid. *Free Radic Biol Med* 1989; 6:593-7
41. Sakai A, Nakayama M, Numata M, Takesawa S, Nakamoto M: Sodium sulfite and N-acetylcysteine: New additives to dialysate for inhibiting formation of glucose degradation products and advanced glycation end-products. *Adv Perit Dial* 2001; 17:66-70
